# Supplementary material for: An Automatic Tool for the Determination of Housing Rental Prices: An Analysis of the Italian Context
Source: MDPI journal article supplement (doi:10.3390/su14010309), 2021-12-28
Supplement: s1 [file s1]

# An Automatic Tool for the Determination of the Housing Rental Prices: An Analysis in the Italian Context

Francesco Tajani <sup>1</sup>, Felicia Di Liddo <sup>2</sup>, Rossana Ranieri <sup>1</sup> and Debora Anelli <sup>2,\*</sup>

<sup>1</sup> Department of Architecture and Design, Sapienza University of Rome, Via Flaminia 359, 00196 Rome, Italy; francesco.tajani@uniroma1.it (F.T.); rossana.ranieri@uniroma1.it (R.R.)

<sup>2</sup> Department of Civil, Environmental, Land, Building Engineering and Chemistry (DICATECh), Polytechnic University of Bari, Via Orabona 4, 70125 Bari, Italy; felicia.diliddo@poliba.it

\* Correspondence: debora.anelli@poliba.it

Received: date; Accepted: date; Published: date

**Table S1.** Descriptive statistics of the variables for the city of Turin.

| Variable                                                                                   | Mean   | Standard Deviation | Levels/Intervals | Frequency [%] |
|--------------------------------------------------------------------------------------------|--------|--------------------|------------------|---------------|
| Rental prices [€]                                                                          | 710.53 | 356.42             | < 500            | 0.36          |
|                                                                                            |        |                    | 501 > 1,500      | 0.62          |
|                                                                                            |        |                    | 1,500 > 2,500    | 0.02          |
|                                                                                            |        |                    | > 2,501          | 0.00          |
|                                                                                            |        |                    |                  |               |
| Internal area [m <sup>2</sup> ]                                                            | 74.18  | 37.91              | < 60             | 0.50          |
|                                                                                            |        |                    | 61 - 90          | 0.27          |
|                                                                                            |        |                    | 91 - 140         | 0.17          |
|                                                                                            |        |                    | 141 - 180        | 0.04          |
|                                                                                            |        |                    | > 181            | 0.02          |
| Surface of balconies, terraces and patios [m <sup>2</sup> ]                                | 5.77   | 9.83               | < 6              | 0.70          |
|                                                                                            |        |                    | 7 - 15           | 0.22          |
|                                                                                            |        |                    | 16 - 30          | 0.06          |
|                                                                                            |        |                    | 31 - 80          | 0.01          |
|                                                                                            |        |                    | > 81             | 0.01          |
| Surface of private external space, i.e. green areas, gardens, courtyards [m <sup>2</sup> ] | 6.97   | 24.01              | < 50             | 0.96          |
|                                                                                            |        |                    | 51 - 100         | 0.03          |
|                                                                                            |        |                    | >100             | 0.01          |
| Presence of condominiumal areas [1-presence; 0 - absence]                                  | 0.33   | 0.47               | 0                | 0.68          |
|                                                                                            |        |                    | 1                | 0.32          |
|                                                                                            | 2.34   | 2.28               |                  |               |

|                                                                                 |             |       |      |
|---------------------------------------------------------------------------------|-------------|-------|------|
| Floor on which the property is located [n.]                                     | < 2         |       | 0.61 |
|                                                                                 | 3 - 5       |       | 0.29 |
|                                                                                 | 6 - 9       |       | 0.10 |
|                                                                                 | > 10        |       | 0.00 |
| Number of bathrooms of the property [n.]                                        | 1.25        | 0.56  |      |
|                                                                                 | 1           |       | 0.79 |
|                                                                                 | 2           |       | 0.20 |
|                                                                                 | >3          |       | 0.01 |
| Presence of kitchen located in the same living room [1 - presence; 0 - absence] | 0.43        | 0.51  |      |
|                                                                                 | 0           |       | 0.54 |
|                                                                                 | 1           |       | 0.46 |
| Quality of the property maintenance conditions [1 - presence; 0 - absence]      | Bad         |       | 0.12 |
|                                                                                 | Good        |       | 0.41 |
|                                                                                 | Excellent   |       | 0.47 |
| EPC label [1 – EPC label of the property, 0 – all the others]                   | Eab         |       | 0.15 |
|                                                                                 | Ecde        |       | 0.47 |
|                                                                                 | Efg         |       | 0.38 |
| Age of the building in which the residential unit is located [n.]               | 1940.46     | 58.89 |      |
|                                                                                 | < 1850      |       | 0.07 |
|                                                                                 | 1851 - 1950 |       | 0.46 |
|                                                                                 | 1951 - 1980 |       | 0.33 |
|                                                                                 | 1981 - 2008 |       | 0.10 |
|                                                                                 | 2009 - 2020 |       | 0.04 |
| Distance from the nearest subway [Km]                                           | 1.84        | 1.36  |      |
|                                                                                 | < 1         |       | 0.40 |
|                                                                                 | 1 < 5       |       | 0.58 |
|                                                                                 | > 5         |       | 0.02 |
| Distance from the central train station [Km]                                    | 3.10        | 1.70  |      |
|                                                                                 | < 1         |       | 0.14 |
|                                                                                 | 1 < 5       |       | 0.71 |
|                                                                                 | > 5         |       | 0.15 |
| Distance from the nearest university center [Km]                                | 2.19        | 1.43  |      |
|                                                                                 | < 1         |       | 0.25 |
|                                                                                 | 1 < 5       |       | 0.70 |
|                                                                                 | > 5         |       | 0.05 |
| Distance from the central pole [Km]                                             | 3.22        | 1.84  |      |
|                                                                                 | < 1         |       | 0.10 |
|                                                                                 | 1 < 5       |       | 0.72 |
|                                                                                 | > 5         |       | 0.18 |
| Distance from the nearest urban green space [Km]                                | 1.87        | 0.94  |      |
|                                                                                 | < 1         |       | 0.15 |
|                                                                                 | 1 < 5       |       | 0.85 |

|                                                                                                        |             |      |
|--------------------------------------------------------------------------------------------------------|-------------|------|
|                                                                                                        | > 5         | 0.00 |
| Municipal trade area [1—if the property belongs to the specific trade area, 0—all the remaining areas] | Central     | 0.18 |
|                                                                                                        | Semicentral | 0.40 |
|                                                                                                        | Peripheral  | 0.40 |
|                                                                                                        | Suburban    | 0.02 |

**Table S2.** Descriptive statistics of the variables for the city of Milan.

| Variable                                                                      | Mean     | Standard Deviation | Levels/Intervals | Frequence<br>[%] |
|-------------------------------------------------------------------------------|----------|--------------------|------------------|------------------|
|                                                                               | 1.655,70 | 1.251,09           |                  |                  |
|                                                                               |          |                    | < 500            | 0.01             |
|                                                                               |          |                    | 501 > 1,500      | 0.66             |
| Rental prices [€]                                                             |          |                    | 1,50 > 2,500     | 0.18             |
|                                                                               |          |                    | 2,501 > 5,000    | 0.12             |
|                                                                               |          |                    | > 5,000          | 0.03             |
|                                                                               | 77.47    | 51.42              |                  |                  |
|                                                                               |          |                    | < 60             | 0.51             |
|                                                                               |          |                    | 61 - 90          | 0.24             |
| Internal area [m²]                                                            |          |                    | 91 - 140         | 0.16             |
|                                                                               |          |                    | 141 - 180        | 0.04             |
|                                                                               |          |                    | > 181            | 0.05             |
|                                                                               | 5.44     | 12.18              |                  |                  |
|                                                                               |          |                    | < 6              | 0.76             |
|                                                                               |          |                    | 7 - 15           | 0.16             |
| Surface of balconies, terraces and patios [m²]                                |          |                    | 16 - 30          | 0.06             |
|                                                                               |          |                    | 31 - 80          | 0.01             |
|                                                                               |          |                    | > 81             | 0.01             |
|                                                                               | 3.40     | 16.91              |                  |                  |
| Surface of private external space, i.e. green areas, gardens, courtyards [m²] |          |                    | < 50             | 0.99             |
|                                                                               |          |                    | 51 - 100         | 0.01             |
|                                                                               |          |                    | >100             | 0.00             |
|                                                                               | 0.32     | 0.47               |                  |                  |
| Presence of condominial areas [1-presence; 0 - absence]                       |          |                    | 0                | 0.68             |
|                                                                               |          |                    | 1                | 0.32             |
|                                                                               | 2.38     | 2.11               |                  |                  |
|                                                                               |          |                    | < 2              | 0.56             |
| Floor on which the property is located [n.]                                   |          |                    | 3 - 5            | 0.36             |
|                                                                               |          |                    | 6 - 9            | 0.08             |
|                                                                               |          |                    | > 10             | 0.00             |
|                                                                               | 1.27     | 0.52               |                  |                  |
| Number of bathrooms of the property [n.]                                      |          |                    | 1                | 0.76             |
|                                                                               |          |                    | 2                | 0.20             |
|                                                                               |          |                    | >3               | 0.04             |

|                                                                                                            |      |      |             |      |
|------------------------------------------------------------------------------------------------------------|------|------|-------------|------|
| Presence of kitchen located in the same living room [1 - presence; 0 - absence]                            | 0.31 | 0.47 |             |      |
|                                                                                                            |      |      | 0           | 0.69 |
|                                                                                                            |      |      | 1           | 0.31 |
| Quality of the property maintenance conditions [1 - presence; 0 - absence]                                 |      |      | Bad         | 0.07 |
|                                                                                                            |      |      | Good        | 0.29 |
|                                                                                                            |      |      | Excellent   | 0.64 |
| EPC label [1 – EPC label of the property, 0 – all the others]                                              |      |      | Eab         | 0.27 |
|                                                                                                            |      |      | Ecde        | 0.25 |
|                                                                                                            |      |      | Efg         | 0.48 |
| Age of the building in which the residential unit is located [n.]                                          | 1950 | 58   |             |      |
|                                                                                                            |      |      | < 1850      | 0.02 |
|                                                                                                            |      |      | 1851 - 1950 | 0.45 |
|                                                                                                            |      |      | 1951 - 1980 | 0.28 |
|                                                                                                            |      |      | 1981 - 2008 | 0.05 |
|                                                                                                            |      |      | 2009 - 2020 | 0.20 |
| Distance from the nearest subway [Km]                                                                      | 1.44 | 6.94 |             |      |
|                                                                                                            |      |      | < 1         | 0.65 |
|                                                                                                            |      |      | 1 < 5       | 0.34 |
|                                                                                                            |      |      | > 5         | 0.01 |
| Distance from the central train station [Km]                                                               | 3.74 | 2.28 |             |      |
|                                                                                                            |      |      | < 1         | 0.05 |
|                                                                                                            |      |      | 1 < 5       | 0.75 |
|                                                                                                            |      |      | > 5         | 0.20 |
| Distance from the nearest university center [Km]                                                           | 2.86 | 1.84 |             |      |
|                                                                                                            |      |      | < 1         | 0.07 |
|                                                                                                            |      |      | 1 < 5       | 0.85 |
|                                                                                                            |      |      | > 5         | 0.08 |
| Distance from the central pole [Km]                                                                        | 3.32 | 2.00 |             |      |
|                                                                                                            |      |      | < 1         | 0.05 |
|                                                                                                            |      |      | 1 < 5       | 0.77 |
|                                                                                                            |      |      | > 5         | 0.18 |
| Distance from the nearest urban green space [Km]                                                           | 1.82 | 1.39 |             |      |
|                                                                                                            |      |      | < 1         | 0.27 |
|                                                                                                            |      |      | 1 < 5       | 0.72 |
|                                                                                                            |      |      | > 5         | 0.01 |
| Municipal trade area [1 – if the property belongs to the specific trade area, 0 – all the remaining areas] |      |      | Central     | 0.27 |
|                                                                                                            |      |      | Semicentral | 0.40 |
|                                                                                                            |      |      | Peripheral  | 0.30 |
|                                                                                                            |      |      | Suburban    | 0.03 |

**Table S3.** Descriptive statistics of the variables for the city of Rome.

| Variable | Mean | Standard Deviation | Levels/Intervals | Frequency [%] |
|----------|------|--------------------|------------------|---------------|
|----------|------|--------------------|------------------|---------------|

|                                                                                |          |          |               |      |
|--------------------------------------------------------------------------------|----------|----------|---------------|------|
|                                                                                | 1,541.74 | 1,255.91 |               |      |
|                                                                                |          |          | < 500         | 0.01 |
|                                                                                |          |          | 501 > 1,500   | 0.68 |
| Rental prices [€]                                                              |          |          | 1,500 > 2,500 | 0.19 |
|                                                                                |          |          | > 2,501       | 0.12 |
|                                                                                | 91.60    | 59.49    |               |      |
|                                                                                |          |          | < 60          | 0.32 |
|                                                                                |          |          | 61 - 90       | 0.35 |
| Internal area [m²]                                                             |          |          | 91 - 140      | 0.21 |
|                                                                                |          |          | 141 - 180     | 0.07 |
|                                                                                |          |          | > 181         | 0.05 |
|                                                                                | 9.55     | 18.04    |               |      |
|                                                                                |          |          | < 6           | 0.63 |
| Surface of balconies, terraces and patios [m²]                                 |          |          | 7 - 15        | 0.21 |
|                                                                                |          |          | 16 - 30       | 0.09 |
|                                                                                |          |          | 31 - 80       | 0.05 |
|                                                                                |          |          | > 81          | 0.02 |
| Surface of private external space, i.e. green areas, gardens, courtyards [m²]  | 8.68     | 27.79    |               |      |
|                                                                                |          |          | < 50          | 0.90 |
|                                                                                |          |          | 51 - 100      | 0.07 |
|                                                                                |          |          | >100          | 0.03 |
| Presence of condominium areas [1- presence; 0 - absence]                       | 0.25     | 0.43     |               |      |
|                                                                                |          |          | 0             | 0.75 |
|                                                                                |          |          | 1             | 0.25 |
|                                                                                | 2.25     | 1.94     |               |      |
| Floor on which the property is located [n.]                                    |          |          | < 2           | 0.59 |
|                                                                                |          |          | 3 - 5         | 0.36 |
|                                                                                |          |          | 6 - 9         | 0.05 |
|                                                                                |          |          | > 10          | 0.00 |
|                                                                                | 1.49     | 0.73     |               |      |
| Number of bathrooms of the property [n.]                                       |          |          | 1             | 0.63 |
|                                                                                |          |          | 2             | 0.28 |
|                                                                                |          |          | >3            | 0.09 |
| Presence of kitchen located in the same living room [1- presence; 0 - absence] | 0.62     | 0.49     |               | 0    |
|                                                                                |          |          | 0             | 0.38 |
|                                                                                |          |          | 1             | 0.62 |
| Quality of the property maintenance conditions [1 - presence; 0 - absence]     |          |          | Bad           | 0.08 |
|                                                                                |          |          | Good          | 0.35 |
|                                                                                |          |          | Excellent     | 0.57 |
|                                                                                |          |          | Eab           | 0.18 |
|                                                                                |          |          | Ecde          | 0.06 |

|                                                                                                                    |      |             |      |
|--------------------------------------------------------------------------------------------------------------------|------|-------------|------|
| EPC label<br>[1—EPC label of the property,<br>0—all the others]                                                    |      | Efg         | 0.76 |
|                                                                                                                    | 1929 | 95.39       |      |
| Age of the building in<br>which the residential unit is<br>located [n.]                                            |      | < 1850      | 0.08 |
|                                                                                                                    |      | 1851 - 1950 | 0.40 |
|                                                                                                                    |      | 1951 - 1980 | 0.36 |
|                                                                                                                    |      | 1981 - 2008 | 0.05 |
|                                                                                                                    |      | 2009 - 2020 | 0.11 |
|                                                                                                                    | 2.08 | 2.28        |      |
| Distance from the<br>nearest subway [Km]                                                                           |      | < 1         | 0.42 |
|                                                                                                                    |      | 1 < 5       | 0.49 |
|                                                                                                                    |      | > 5         | 0.08 |
|                                                                                                                    | 5.55 | 3.77        |      |
| Distance from the<br>central train station [Km]                                                                    |      | < 1         | 0.05 |
|                                                                                                                    |      | 1 < 5       | 0.52 |
|                                                                                                                    |      | > 5         | 0.43 |
|                                                                                                                    | 4.36 | 2.57        |      |
| Distance from the<br>nearest university center<br>[Km]                                                             |      | < 1         | 0.02 |
|                                                                                                                    |      | 1 < 5       | 0.68 |
|                                                                                                                    |      | > 5         | 0.30 |
|                                                                                                                    | 5.43 | 3.75        |      |
| Distance from the<br>central pole [Km]                                                                             |      | < 1         | 0.03 |
|                                                                                                                    |      | 1 < 5       | 0.56 |
|                                                                                                                    |      | > 5         | 0.41 |
|                                                                                                                    | 2.52 | 2.22        |      |
| Distance from the<br>nearest urban green space<br>[Km]                                                             |      | < 1         | 0.24 |
|                                                                                                                    |      | 1 < 5       | 0.64 |
|                                                                                                                    |      | > 5         | 0.12 |
| Municipal trade area [1—if<br>the property<br>belongs to the specific<br>trade area, 0—all the<br>remaining areas] |      | Central     | 0.26 |
|                                                                                                                    |      | Semicentral | 0.42 |
|                                                                                                                    |      | Peripheral  | 0.24 |
|                                                                                                                    |      | Suburban    | 0.08 |

**Table S4.** Descriptive statistics of the variables for the city of Naples.

| Variable          | Mean   | Standard Deviation | Levels/Intervals | Frequence<br>[%] |
|-------------------|--------|--------------------|------------------|------------------|
|                   | 915.66 | 461.37             |                  |                  |
|                   |        |                    | < 500            | 0.15             |
|                   |        |                    | 501 > 1,500      | 0.76             |
| Rental prices [€] |        |                    | 1,500 > 2,500    | 0.08             |
|                   |        |                    | > 2,501          | 0.01             |

|                                |       |        |             |      |
|--------------------------------|-------|--------|-------------|------|
|                                | 74.33 | 34.06  |             |      |
|                                |       |        | < 60        | 0.42 |
|                                |       |        | 61 - 90     | 0.28 |
| Internal area [m²]             |       |        | 91 - 140    | 0.26 |
|                                |       |        | 141 - 180   | 0.03 |
|                                |       |        | > 181       | 0.01 |
|                                | 7.52  | 15.28  |             |      |
|                                |       |        | < 6         | 0.70 |
| Surface of balconies,          |       |        | 7 - 15      | 0.20 |
| terraces and patios [m²]       |       |        | 16 - 30     | 0.06 |
|                                |       |        | 31 - 80     | 0.03 |
|                                |       |        | > 81        | 0.01 |
| Surface of private             | 22.49 | 141.12 |             |      |
| external space, i.e. green     |       |        | < 50        | 0.92 |
| areas, gardens, courtyards     |       |        | 51 - 100    | 0.06 |
| [m²]                           |       |        | >100        | 0.04 |
| Presence of                    | 0.22  | 0.42   |             |      |
| condominial areas              |       |        | 0           | 0.78 |
| [1-presence; 0 - absence]      |       |        | 1           | 0.22 |
|                                | 2.15  | 1.93   |             |      |
|                                |       |        | < 2         | 0.63 |
| Floor on which the             |       |        | 3 - 5       | 0.32 |
| property is located [n.]       |       |        | 6 - 9       | 0.05 |
|                                |       |        | > 10        | 0.00 |
|                                | 1.36  | 0.55   |             |      |
| Number of bathrooms            |       |        | 1           | 0.67 |
| of the property [n.]           |       |        | 2           | 0.29 |
|                                |       |        | >3          | 0.04 |
| Presence of kitchen located in | 0.52  | 0.50   |             |      |
| the same living room           |       |        | 0           | 0.48 |
| [1-presence; 0 - absence]      |       |        | 1           | 0.52 |
| Quality of the property        |       |        | Bad         | 0.07 |
| maintenance conditions         |       |        | Good        | 0.50 |
| [1 -presence; 0 - absence]     |       |        | Excellent   | 0.43 |
| EPC label                      |       |        | Eab         | 0.24 |
| [1—EPC label of the property,  |       |        | Ecde        | 0.09 |
| 0—all the others]              |       |        | Efg         | 0.67 |
|                                | 1940  | 56.54  |             |      |
| Age of the building in         |       |        | < 1850      | 0.03 |
| which the residential unit is  |       |        | 1851 - 1950 | 0.45 |
| located [n.]                   |       |        | 1951 - 1980 | 0.48 |
|                                |       |        | 1981 - 2008 | 0.03 |

|                                                                                                                 |      |             |      |
|-----------------------------------------------------------------------------------------------------------------|------|-------------|------|
|                                                                                                                 |      | 2009 - 2020 | 0.01 |
|                                                                                                                 | 1.54 | 1.50        |      |
| Distance from the<br>nearest subway [Km]                                                                        |      | < 1         | 0.58 |
|                                                                                                                 |      | 1 < 5       | 0.38 |
|                                                                                                                 |      | > 5         | 0.04 |
|                                                                                                                 | 5.29 | 4.40        |      |
| Distance from the<br>central train station [Km]                                                                 |      | < 1         | 0.02 |
|                                                                                                                 |      | 1 < 5       | 0.57 |
|                                                                                                                 |      | > 5         | 0.41 |
|                                                                                                                 | 3.53 | 2.24        |      |
| Distance from the<br>nearest university center<br>[Km]                                                          |      | < 1         | 0.15 |
|                                                                                                                 |      | 1 < 5       | 0.60 |
|                                                                                                                 |      | > 5         | 0.25 |
|                                                                                                                 | 3.90 | 2.38        |      |
| Distance from the<br>central pole [Km]                                                                          |      | < 1         | 0.09 |
|                                                                                                                 |      | 1 < 5       | 0.58 |
|                                                                                                                 |      | > 5         | 0.33 |
|                                                                                                                 | 2.22 | 1.63        |      |
| Distance from the<br>nearest urban green space<br>[Km]                                                          |      | < 1         | 0.27 |
|                                                                                                                 |      | 1 < 5       | 0.66 |
|                                                                                                                 |      | > 5         | 0.07 |
| Municipal trade area<br>[1—if the property belongs to<br>the specific trade area, 0—all<br>the remaining areas] |      | Central     | 0.47 |
|                                                                                                                 |      | Semicentral | 0.25 |
|                                                                                                                 |      | Peripheral  | 0.17 |
|                                                                                                                 |      | Suburban    | 0.11 |

**Table S5.** Descriptive statistics of the variables for the city of Catania.

| Variable           | Mean   | Standard Deviation | Levels/Intervals | Frequency<br>[%] |
|--------------------|--------|--------------------|------------------|------------------|
|                    | 658.79 | 298.35             |                  |                  |
| Rental prices [€]  |        |                    | < 500            | 0.31             |
|                    |        |                    | 501 > 1,500      | 0.68             |
|                    |        |                    | 1,500 > 2,500    | 0.01             |
|                    |        |                    | > 2,501          | 0.00             |
|                    |        |                    |                  |                  |
|                    | 89.93  | 50.08              |                  |                  |
| Internal area [m²] |        |                    | < 60             | 0.32             |
|                    |        |                    | 61 - 90          | 0.26             |
|                    |        |                    | 91 - 140         | 0.32             |
|                    |        |                    | 141 - 180        | 0.05             |
|                    |        |                    | > 181            | 0.05             |
|                    | 10.95  | 30.65              |                  |                  |



|                                                                               |      |        |             |      |
|-------------------------------------------------------------------------------|------|--------|-------------|------|
| Surface of balconies, terraces and patios [m²]                                |      |        | < 6         | 0.58 |
|                                                                               |      |        | 7 - 15      | 0.26 |
|                                                                               |      |        | 16 - 30     | 0.10 |
|                                                                               |      |        | 31 - 80     | 0.05 |
|                                                                               |      |        | > 81        | 0.01 |
| Surface of private external space, i.e. green areas, gardens, courtyards [m²] | 0.01 | 21.30  |             |      |
|                                                                               |      |        | < 50        | 0.98 |
|                                                                               |      |        | 51 - 100    | 0.01 |
|                                                                               |      |        | >100        | 0.01 |
| Presence of condominiumal areas [1-presence; 0 - absence]                     | 0.10 | 0.42   |             |      |
|                                                                               |      |        | 0           | 0.92 |
|                                                                               |      |        | 1           | 0.08 |
| Floor on which the property is located [n.]                                   | 2.22 | 1.92   |             |      |
|                                                                               |      |        | < 2         | 0.65 |
|                                                                               |      |        | 3 - 5       | 0.27 |
|                                                                               |      |        | 6 - 9       | 0.08 |
|                                                                               |      |        | > 10        | 0.00 |
| Number of bathrooms of the property [n.]                                      | 1.35 | 0.54   |             |      |
|                                                                               |      |        | 1           | 0.68 |
|                                                                               |      |        | 2           | 0.30 |
|                                                                               |      |        | >3          | 0.02 |
| Presence of kitchen located in the same living room [1-presence; 0 - absence] | 0.66 | 0.48   |             |      |
|                                                                               |      |        | 0           | 0.34 |
|                                                                               |      |        | 1           | 0.66 |
| Quality of the property maintenance conditions [1 -presence; 0 - absence]     |      |        | Bad         | 0.02 |
|                                                                               |      |        | Good        | 0.42 |
|                                                                               |      |        | Excellent   | 0.56 |
| EPC label [1—EPC label of the property, 0—all the others]                     |      |        | Eab         | 0.07 |
|                                                                               |      |        | Ecde        | 0.18 |
|                                                                               |      |        | Efg         | 0.75 |
| Age of the building in which the residential unit is located [n.]             | 1941 | 128.82 |             |      |
|                                                                               |      |        | < 1850      | 0.03 |
|                                                                               |      |        | 1851 - 1950 | 0.33 |
|                                                                               |      |        | 1951 - 1980 | 0.54 |
|                                                                               |      |        | 1981 - 2008 | 0.06 |
|                                                                               |      |        | 2009 - 2020 | 0.04 |
| Distance from the nearest subway [Km]                                         | 0.95 | 0.81   |             |      |
|                                                                               |      |        | < 1         | 0.71 |
|                                                                               |      |        | 1 < 5       | 0.29 |
|                                                                               |      |        | > 5         | 0.00 |
| Distance from the central train station [Km]                                  | 2.36 | 1.51   |             |      |
|                                                                               |      |        | < 1         | 0.11 |
|                                                                               |      |        |             |      |

|                                                                                                                     |      |             |      |
|---------------------------------------------------------------------------------------------------------------------|------|-------------|------|
|                                                                                                                     |      | 1 < 5       | 0.84 |
|                                                                                                                     |      | > 5         | 0.05 |
|                                                                                                                     | 2.22 | 1.32        |      |
| Distance from the<br>nearest university center<br>[Km]                                                              |      | < 1         | 0.21 |
|                                                                                                                     |      | 1 < 5       | 0.75 |
|                                                                                                                     |      | > 5         | 0.04 |
|                                                                                                                     | 2.30 | 1.40        |      |
| Distance from the<br>central pole [Km]                                                                              |      | < 1         | 0.20 |
|                                                                                                                     |      | 1 < 5       | 0.76 |
|                                                                                                                     |      | > 5         | 0.04 |
|                                                                                                                     | 1.41 | 0.92        |      |
| Distance from the<br>nearest urban green space<br>[Km]                                                              |      | < 1         | 0.37 |
|                                                                                                                     |      | 1 < 5       | 0.62 |
|                                                                                                                     |      | > 5         | 0.01 |
| Municipal trade area<br>[1 – if the property belongs to<br>the specific trade area, 0 – all<br>the remaining areas] |      | Central     | 0.25 |
|                                                                                                                     |      | Semicentral | 0.27 |
|                                                                                                                     |      | Peripheral  | 0.10 |
|                                                                                                                     |      | Suburban    | 0.38 |
